# Supplementary material for: SARS-CoV-2 Infection and C-Section: A Prospective Observational Study
Source: MDPI journal article supplement (doi:10.3390/v13112330), 2021-11-22
Supplement: s1 [file s1]

**Supplementary Table S1.** List of hospitals members of the Spanish Obstetric Emergency Group included in this study (n = 79).

| <b>HOSPITAL</b>                                                               |
|-------------------------------------------------------------------------------|
| AGSE Hospital Axarquía                                                        |
| Complejo Asistencial de León                                                  |
| Complejo Hospitalario A Coruña                                                |
| Complejo Hospitalario de Jaén                                                 |
| Complejo Hospitalario San Millán y San Pedro                                  |
| Complejo Hospitalario Universitario de Pontevedra                             |
| Complexo Hospitalario Universitario de Ourense                                |
| HM Hospital Nuevo Belén                                                       |
| Hospital Alto Guadalquivir                                                    |
| Hospital Álvaro Cunqueiro                                                     |
| Hospital Arnau de Vilanova                                                    |
| Hospital Clínico de Santiago de Compostela                                    |
| Hospital Clínico San Carlos                                                   |
| Hospital Clínico San Cecilio (Complejo Hospitalario Universitario de Granada) |
| Hospital Clínico Universitario de Valladolid                                  |
| Hospital Clínico Universitario Virgen de la Arrixaca                          |
| Hospital Costa del Sol                                                        |
| Hospital de la Santa Creu i Sant Pau                                          |
| Hospital de Poniente                                                          |
| Hospital de Santa Caterina                                                    |
| Hospital de Son Llàtzer                                                       |
| Hospital de Torrejón                                                          |
| Hospital de Vinalopó                                                          |
| Hospital del Mar                                                              |
| Hospital del Tajo                                                             |
| Hospital d'Inca                                                               |
| Hospital do Barbanza                                                          |
| Hospital Doce de Octubre                                                      |
| Hospital Donostia                                                             |
| Hospital General de L'Hospitalet                                              |
| Hospital General La Mancha Centro                                             |
| Hospital General Universitario de Ciudad Real                                 |
| Hospital General Universitario Gregorio Marañón                               |
| Hospital General Universitario Santa Lucía                                    |
| Hospital Infanta Margarita                                                    |
| Hospital Jerez de la Frontera                                                 |
| Hospital La Fe                                                                |
| Hospital La Línea                                                             |
| Hospital Parc Taulí                                                           |
| Hospital Puerta de Hierro                                                     |
| Hospital Quirón Pozuelo de Alarcón                                            |
| Hospital Quirónsalud Málaga                                                   |
| Hospital Rafael Méndez                                                        |

|                                                      |
|------------------------------------------------------|
| Hospital Regional Universitario de Málaga            |
| Hospital Reina Sofía                                 |
| Hospital San Pedro Alcántara                         |
| Hospital Sant Joan de Reus                           |
| Hospital Santa Ana                                   |
| Hospital Universitari Dexeus - Grupo Quirónsalud     |
| Hospital Universitari Germans Trias i Pujol          |
| Hospital Universitario Araba-Txagorritxu             |
| Hospital Universitario Central de Asturias           |
| Hospital Universitario de Basurto                    |
| Hospital Universitario de Burgos                     |
| Hospital Universitario de Cabueñes                   |
| Hospital Universitario de Ceuta                      |
| Hospital Universitario de Ferrol                     |
| Hospital Universitario de Fuenlabrada                |
| Hospital Universitario de Girona Doctor Josep Trueta |
| Hospital Universitario de Salamanca                  |
| Hospital Universitario de Tarragona Juan XXIII       |
| Hospital Universitario de Torrevieja                 |
| Hospital Universitario Doctor Peset                  |
| Hospital Universitario Infanta Sofía                 |
| Hospital Universitario Juan Ramón Jiménez            |
| Hospital Universitario La Paz                        |
| Hospital Universitario Puerta del Mar                |
| Hospital Universitario Río Hortega                   |
| Hospital Universitario Son Espases                   |
| Hospital Universitario Torrecárdenas                 |
| Hospital Universitario Virgen de las Nieves          |
| Hospital Universitario Virgen de Valme               |
| Hospital Universitario Virgen del Rocío              |
| Hospital Universitario Virgen Macarena               |
| Hospital Universitario de Getafe                     |
| Hospital Universitario Severo Ochoa                  |
| Hospital Viamed Santa Ángela de la Cruz              |
| Hospital Virgen de la Concha                         |
| Hospital Virgen de la Luz                            |

**Supplementary Table S2.** STROBE Statement—checklist of items that should be included in reports of observational studies

|                      | Item No. | Recommendation                                                                                                                                                                     | Page No.                                 | Relevant text from manuscript |
|----------------------|----------|------------------------------------------------------------------------------------------------------------------------------------------------------------------------------------|------------------------------------------|-------------------------------|
| Title and abstract   | 1        | (a) Indicate the study’s design with a commonly used term in the title or the abstract                                                                                             | 1                                        |                               |
|                      |          | (b) Provide in the abstract an informative and balanced summary of what was done and what was found                                                                                | 2                                        |                               |
| Introduction         |          |                                                                                                                                                                                    |                                          |                               |
| Background/rationale | 2        | Explain the scientific background and rationale for the investigation being reported                                                                                               | 2-3                                      |                               |
| Objectives           | 3        | State specific objectives, including any prespecified hypotheses                                                                                                                   | 3                                        |                               |
| Methods              |          |                                                                                                                                                                                    |                                          |                               |
| Study design         | 4        | Present key elements of study design early in the paper                                                                                                                            | 3-4                                      |                               |
| Setting              | 5        | Describe the setting, locations, and relevant dates, including periods of recruitment, exposure, follow-up, and data collection                                                    | 3-4, Figure 1 and Supplementary Table S1 |                               |
| Participants         | 6        | (a) Cohort study—Give the eligibility criteria, and the sources and methods of selection of participants. Describe methods of follow-up                                            |                                          |                               |
|                      |          | Case-control study—Give the eligibility criteria, and the sources and methods of case ascertainment and control selection. Give the rationale for the choice of cases and controls | 3-4 and Figure 1                         |                               |
|                      |          | Cross-sectional study—Give the eligibility criteria, and the                                                                                                                       |                                          |                               |

|                              |    |                                                                                                                                                                                                                                 |                                                                                                                                                                 |
|------------------------------|----|---------------------------------------------------------------------------------------------------------------------------------------------------------------------------------------------------------------------------------|-----------------------------------------------------------------------------------------------------------------------------------------------------------------|
|                              |    | sources and methods of selection of participants                                                                                                                                                                                |                                                                                                                                                                 |
|                              |    | <p>(b) <i>Cohort study</i>—For matched studies, give matching criteria and number of exposed and unexposed</p> <p><i>Case-control study</i>—For matched studies, give matching criteria and the number of controls per case</p> |                                                                                                                                                                 |
| Variables                    | 7  | Clearly define all outcomes, exposures, predictors, potential confounders, and effect modifiers. Give diagnostic criteria, if applicable                                                                                        | <p>3-4 and registry protocol:<br/> <a href="https://osf.io/xspwq/">https://osf.io/xspwq/</a><br/> <a href="https://osf.io/m5yps/">https://osf.io/m5yps/</a></p> |
| Data sources/<br>measurement | 8* | For each variable of interest, give sources of data and details of methods of assessment (measurement). Describe comparability of assessment methods if there is more than one group                                            | <p>3-4 and registry protocol:<br/> <a href="https://osf.io/xspwq/">https://osf.io/xspwq/</a><br/> <a href="https://osf.io/m5yps/">https://osf.io/m5yps/</a></p> |
| Bias                         | 9  | Describe any efforts to address potential sources of bias                                                                                                                                                                       | 4 and 13                                                                                                                                                        |
| Study size                   | 10 | Explain how the study size was arrived at                                                                                                                                                                                       | 3-4 and Figure 1                                                                                                                                                |
